# Supplementary material for: Genome-wide association mapping of grain yield in a diverse collection of spring wheat (Triticum aestivum L.) evaluated in southern Australia
Source: PLoS One. 2019 Feb 4;14(2):e0211730. doi: 10.1371/journal.pone.0211730 (PMC6361508; doi:10.1371/journal.pone.0211730)
Supplement: S9 Table — Alleles increasing yield are highlighted in blue and alleles decreasing yield are highlighted in yellow. Markers are ordered from left to right based on their position on the CS IWGSC RefSeq v 1.0. (XLSX) [file pone.0211730.s015.xlsx]

## Sheet: 5A_QTL_Allele_effect
S9 Table. QYLD.aww-5A haplotypes. Alleles increasing yield are highlighted in blue and alleles decreasing yield are highlighted in yellow. Markers are ordered from left to right based on their position on the CS IWGSC RefSeq v 1.0.
Accession	5A_BS00023152_51	5A_Excalibur_c27558_298	5A_BS00066652_51	5A_BS00065714_51	Yield2014	Yield2015	Haplotype	Country of Origin
RAC655	AA	BB	AA	AA	3.16568	2.87244	I	AUSTRALIA (SA)
cid473259sid69	AA	BB	AA	AA	3.09861	3.04601	I	MEXICO (CIMMYT)
PUNJAB 5	AA	BB	AA	AA	1.46312	1.17913	I	INDIA
cid460356sid168	AA	BB	AA	AA	3.24333	2.51232	I	MEXICO (CIMMYT)
cid460334sid63	AA	BB	AA	AA	3.08682	2.41753	I	MEXICO (CIMMYT)
HTWYT-015	AA	BB	AA	AA	2.22213	2.41572	I	MEXICO (CIMMYT)
PUNJAB 18	AA	BB	AA	AA	2.30387	1.09954	I	PAKISTAN
W 98	AA	BB	AA	AA	3.3027	1.92933	I	PAKISTAN
H 1287	AA	BB	AA	AA	1.90716	0.910475	I	AFGHANISTAN
PERSIA 4	AA	BB	AA	AA	1.7788	1.62033	I	IRAN
IRAQ 1	AA	BB	AA	AA	1.96669	1.00596	I	IRAQ
H 1328A	AA	BB	AA	AA	NA	0.713108	I	AFGHANISTAN
WYLAH	AA	BB	AA	AA	2.67942	2.80578	I	AUSTRALIA (NSW)
NP120	AA	BB	AA	AA	1.03595	1.0922	I	INDIA
GREBE	AA	BB	AA	AA	2.55306	2.75521	I	AUSTRALIA (NSW)
cid394087sid30	AA	BB	AA	AA	2.86061	2.35299	I	MEXICO (CIMMYT)
FANG 60	AA	BB	AA	AA	2.36692	2.02363	I	THAILAND
H 11	AA	BB	AA	AA	1.71941	1.24759	I	AFGHANISTAN
PI625123-3	AA	BB	AA	AA	1.38143	1.23202	I	NA
cid388444sid89	AA	BB	AA	AA	2.0532	2.41958	I	MEXICO (CIMMYT)
H 1550	AA	BB	AA	AA	1.9713	1.01527	I	AFGHANISTAN
PI625983-1	AA	BB	AA	AA	1.45287	1.18884	I	NA
cid460342sid40	AA	BB	AA	AA	1.38296	2.58908	I	MEXICO (CIMMYT)
H 1302	AA	BB	AA	AA	1.70425	0.860513	I	AFGHANISTAN
H 1369	AA	BB	AA	AA	1.49519	1.37505	I	NA
cid460354sid105	AA	BB	AA	AA	2.1188	2.64276	I	MEXICO (CIMMYT)
EXCALIBUR	AA	BB	AA	AA	3.46419	3.36495	I	AUSTRALIA (SA)
LARK	AA	BB	AA	AA	2.59179	2.35806	I	AUSTRALIA (NSW)
7HRWSN108	AA	BB	AA	AA	3.67692	2.65678	I	CIMMYT
KUNJIN	AA	BB	AA	AA	3.89156	3.11609	I	AUSTRALIA
CUNNINGHAM	AA	BB	AA	AA	3.2317	2.97	I	AUSTRALIA (QLD)
BUNGULLA	AA	BB	AA	AA	2.30785	1.91865	I	AUSTRALIA (WA)
cid399062sid49	AA	BB	AA	AA	3.45073	2.92721	I	MEXICO (CIMMYT)
N67M2	AA	BB	AA	AA	3.16491	2.2012	I	ISRAEL
KING ROCK	AA	BB	AA	AA	3.14896	3.06803	I	AUSTRALIA (WA)
ELLISON	AA	BB	AA	AA	3.4656	3.00642	I	AUSTRALIA (VIC)
YECORA 70	AA	BB	AA	AA	3.4319	3.60641	I	CHILE
GUISUISKAYA_SYAO_BAI_MAI	AA	BB	AA	AA	1.87611	1.20272	I	CHINA
PAMUKALE	AA	BB	AA	AA	3.10644	2.17525	I	TURKEY
HTWYT-028	AA	BB	AA	AA	1.31332	2.94257	I	MEXICO (CIMMYT)
H 1314	AA	BB	AA	AA	1.11064	0.753486	I	AFGHANISTAN
JANZ	AA	BB	AA	AA	1.74493	3.08169	I	AUSTRALIA (QLD)
PROMESSA	AA	BB	AA	AA	2.54996	1.31552	I	NETHERLANDS
Cul 1	AA	BB	AA	AA	NA	1.10232	I	Kazakhstan
GRANAROLO	AA	BB	AA	AA	3.18705	2.67904	I	ITALY
cid279826sid63	AA	BB	AA	AA	2.94928	1.76256	I	MEXICO (CIMMYT)
INDIA-134	AA	BB	AA	AA	1.46851	1.39411	I	INDIA
WW 2449	AA	BB	AA	AA	2.43434	2.04387	I	AUSTRALIA (NSW)
ALSEN	AA	BB	AA	AA	2.97631	2.65198	I	UNITED STATES
OPATA 85	AA	BB	AA	AA	2.85333	2.32607	I	MEXICO (CIMMYT)
cid183961sid5	AA	BB	AA	AA	2.50593	1.63436	I	MEXICO (CIMMYT)
cid394062sid22	AA	BB	AA	AA	3.60677	3.06853	I	MEXICO (CIMMYT)
PEGASO	AA	BB	AA	AA	2.16	2.35285	I	ITALY
BT2281	AA	BB	AA	AA	2.28583	2.71863	I	TUNISIA
PERSIA 29	AA	BB	AA	AA	2.06812	1.13489	I	IRAN
ODESSA EXP STA 19565	AA	BB	AA	AA	3.02521	2.04243	I	ETHIOPIA
PERSIA 17	AA	BB	AA	AA	1.49864	0.688163	I	IRAN
cid473259sid70	AA	BB	AA	AA	3.66414	2.79343	I	MEXICO (CIMMYT)
BUCK ATLANTICO	AA	BB	AA	AA	2.25607	1.85173	I	ARGENTINA
cid192646sid0	AA	BB	AA	AA	3.0214	2.83683	I	MEXICO (CIMMYT)
MOCHO DE ESPIGA BRANCA	AA	BB	AA	AA	2.256	1.03289	I	PORTUGAL
AMC 142	AA	BB	AA	AA	NA	NA	I	IRAN
PRESTON	AA	BB	AA	AA	2.59494	2.88336	I	AUSTRALIA
LW 369	AA	BB	AA	AA	1.6751	1.68194	I	TURKMENISTAN
6HRWSN98	AA	BB	AA	AA	3.30203	3.22235	I	MEXICO (CIMMYT)
PASTOR	AA	BB	AA	AA	2.90968	2.3394	I	MEXICO (CIMMYT)
cid428592sid124	AA	BB	AA	AA	2.23771	2.27392	I	MEXICO (CIMMYT)
W 21A	AA	BB	AA	AA	1.78194	0.543688	I	PAKISTAN
H 1632	AA	BB	AA	AA	1.70722	1.42085	I	AFGHANISTAN
H 339	AA	BB	AA	AA	1.4735	2.56757	I	AFGHANISTAN
H 1647	AA	BB	AA	AA	2.28836	0.908589	I	AFGHANISTAN
FUKUHOKOMUGI	AA	BB	AA	AA	2.93624	2.83229	I	JAPAN
Cul 10	AA	BB	AA	AA	2.05161	1.36755	I	Kazakhstan
cid425852sid48	AA	BB	AA	AA	3.22971	2.75465	I	MEXICO (CIMMYT)
CHINESE SPRING	AA	BB	AA	AA	1.20343	0.391777	I	MEXICO (CIMMYT)
H 1305	AA	BB	AA	AA	1.63312	0.680893	I	NA
cid425878sid86	AA	BB	AA	AA	2.7857	2.75052	I	MEXICO (CIMMYT)
cid460354sid132	AA	BB	AA	AA	2.87017	1.6786	I	MEXICO (CIMMYT)
cid394715sid160	AA	BB	AA	AA	3.1832	2.34793	I	Kenya
H 1380	AA	BB	AA	AA	2.932	1.41242	I	AFGHANISTAN
H 1621	AA	BB	AA	AA	2.46631	1.31613	I	AFGHANISTAN
EGA JITARNING	AA	BB	AA	AA	3.59769	2.80274	I	AUSTRALIA (WA)
EGA EAGLEHAWK	AA	BB	AA	AA	2.70762	2.14734	I	AUSTRALIA (VIC)
EGA WEDGETAIL	AA	BB	AA	AA	2.0629	2.53474	I	AUSTRALIA (NSW)
BANKS	AA	BB	AA	AA	2.99333	2.6226	I	AUSTRALIA (NSW)
AXE	AA	BB	AA	AA	3.55562	2.84001	I	AUSTRALIA (SA)
CHAMPTAL	AA	BB	AA	AA	1.41097	2.35613	I	FRANCE
BURRION	AA	BB	AA	AA	2.67743	0.489679	I	MEXICO (CIMMYT)
BENCUBBIN	AA	BB	AA	AA	1.99166	1.63393	I	AUSTRALIA (WA)
PELSART	AA	BB	AA	AA	0.883683	2.68894	I	AUSTRALIA (QLD)
EGA 2248	AA	BB	AA	AA	3.5016	3.57215	I	AUSTRALIA (WA)
GILES	AA	BB	AA	AA	2.57666	3.41498	I	AUSTRALIA (QLD)
GLADIUS	AA	BB	AA	AA	1.80275	3.05054	I	AUSTRALIA (SA)
CADOUX	AA	BB	AA	AA	2.49189	2.36459	I	AUSTRALIA (WA)
LONGREACH CATALINA	AA	BB	AA	AA	3.65014	3.39505	I	AUSTRALIA (VIC)
SUN 325B	AA	BB	AA	AA	3.16504	2.15198	I	AUSTRALIA
SUNBRI	AA	BB	AA	AA	2.28605	2.46904	I	AUSTRALIA (NSW)
SUJATA	AA	BB	AA	AA	1.56073	1.91301	I	INDIA
SONGLEN	AA	BB	AA	AA	2.44699	2.51237	I	AUSTRALIA (NSW)
LONGREACH CRUSADER	AA	BB	AA	AA	3.74658	3.04587	I	AUSTRALIA
cid473237sid34	AA	BB	AA	AA	3.32935	3.20973	I	MEXICO (CIMMYT)
AE.SQUARROSA (210)	AA	BB	AA	AA	NA	NA	I	NA
cid423295sid45	AA	BB	AA	AA	3.06139	1.77765	I	MEXICO (CIMMYT)
THORI 212-VAR 8/1	AA	BB	AA	AA	1.85912	1.50746	I	PAKISTAN
BUCKBUCK'S	AA	BB	AA	AA	3.20267	2.56765	I	MEXICO (CIMMYT)
cid472868sid38	AA	BB	AA	AA	2.10458	0.448524	I	MEXICO (CIMMYT)
cid69587sid58	AA	BB	AA	AA	2.71613	2.59099	I	MEXICO (CIMMYT)
MEC	AA	BB	AA	AA	2.23663	1.10143	I	NA
MACE	AA	BB	AA	AA	3.41688	3.20501	I	AUSTRALIA (SA)
MOROCCO 426	AA	BB	AA	AA	NA	0.769711	I	MEXICO (CIMMYT)
W 48B	AA	BB	AA	AA	2.07964	1.17977	I	PAKISTAN
cid183298sid1	AA	BB	AA	AA	2.24747	1.66625	I	MEXICO (CIMMYT)
PERSIA 111	AA	BB	AA	AA	0.999752	1.85137	I	IRAN
cid183300sid3	AA	BB	AA	AA	2.15337	1.54673	I	MEXICO (CIMMYT)
VERANOPOLIS	AA	BB	AA	AA	1.22637	1.2767	I	BRAZIL
HTWYT-003	AA	BB	AA	AA	2.93542	3.05143	I	MEXICO (CIMMYT)
AE.SQUARROSA (205)	AA	BB	AA	AA	1.86886	2.03348	I	MEXICO (CIMMYT)
HTWYT-012	AA	BB	AA	AA	3.84572	2.59678	I	MEXICO (CIMMYT)
HTWYT 013	AA	BB	AA	AA	2.66537	1.3531	I	NA
H 1537	AA	BB	AA	AA	2.13009	2.09313	I	AFGHANISTAN
cid399013sid209	AA	BB	AA	AA	3.27198	1.87478	I	MEXICO (CIMMYT)
cid394799sid20	AA	BB	AA	AA	2.96194	2.72753	I	MEXICO (CIMMYT)
ACADEMIE DE PEKIN	AA	BB	AA	AA	2.15267	1.55452	I	CHINA
cid91078sid341	AA	BB	AA	AA	2.90286	2.57913	I	MEXICO (CIMMYT)
Kuldzhinskaya	AA	BB	AA	AA	1.92236	0.578325	I	CHINA
GUTHA	AA	BB	AA	AA	2.1182	1.91581	I	AUSTRALIA (WA)
EMU'S	AA	BB	AA	AA	2.65249	2.61811	I	MEXICO (CIMMYT)
cid431763sid639	AA	BB	AA	AA	2.95528	2.41445	I	MEXICO (CIMMYT)
cid463491sid196	AA	BB	AA	AA	3.28726	2.68284	I	MEXICO (CIMMYT)
PITIC 62	AA	BB	AA	AA	NA	NA	I	NA
cid472927sid53	AA	BB	AA	AA	2.99011	2.25926	I	MEXICO (CIMMYT)
HARTOG	AA	BB	AA	AA	2.73623	2.45298	I	AUSTRALIA (QLD)
cid427898sid67	AA	BB	AA	AA	3.16644	2.43913	I	MEXICO (CIMMYT)
H 1550	AA	BB	AA	AA	2.00654	1.32099	I	AFGHANISTAN
H 1542	AA	BB	AA	AA	3.5797	1.65368	I	AFGHANISTAN
NABAWA	AA	BB	AA	AA	1.85995	1.14901	I	AUSTRALIA (NSW)
NORIN 60	AA	BB	AA	AA	2.48853	1.63603	I	JAPAN
NANKING NO25	AA	BB	AA	AA	1.55634	0.494413	I	CHINA
NORIN 10	AA	BB	AA	AA	2.64804	2.51151	I	JAPAN
NORIN 64	AA	BB	AA	AA	2.24614	2.01105	I	JAPAN
HEREWARD	AA	BB	AA	AA	NA	0.86775	I	GREAT BRITAIN
HTWYT-001	AA	BB	AA	AA	2.84182	2.96483	I	MEXICO (CIMMYT)
HTWYT-009	AA	BB	AA	AA	3.11504	2.72488	I	MEXICO (CIMMYT)
H 1409	AA	BB	AA	AA	NA	0.661558	I	AFGHANISTAN
FORTUNE	AA	BB	AA	AA	NA	NA	I	AUSTRALIA (SA)
FLINDERS	AA	BB	AA	AA	2.46491	2.39588	I	AUSTRALIA (QLD)
LW 337	AA	BB	AA	AA	1.41686	0.425839	I	ETHIOPIA
LW 335	AA	BB	AA	AA	NA	0.92012	I	TURKEY
LW 334	AA	BB	AA	AA	NA	0.885602	I	TURKEY
LW 333	AA	BB	AA	AA	2.14082	1.48593	I	ARMENIA
LIVINGSTON	AA	BB	AA	AA	2.50167	2.29569	I	AUSTRALIA
MENFLO	AA	BB	AA	AA	2.19423	0.455267	I	CHILE
MENTANA	AA	BB	AA	AA	2.25204	1.5575	I	ITALY
KALYANSONA	AA	BB	AA	AA	3.14083	2.45246	I	INDIA
JUPATECO 73	AA	BB	AA	AA	2.80349	2.97101	I	MEXICO (CIMMYT)
JO3045	AA	BB	AA	AA	NA	0.831137	I	FINLAND
INDIA-323	AA	BB	AA	AA	1.82997	1.86445	I	INDIA
INDIS	AA	BB	AA	AA	2.80031	3.26639	I	SOUTH AFRICA
INIA 66	AA	BB	AA	AA	2.43641	2.89103	I	MEXICO (CIMMYT)
KRICHAUFF	AA	BB	AA	AA	3.1919	2.78193	I	AUSTRALIA (SA)
KULIN	AA	BB	AA	AA	1.88518	3.21547	I	AUSTRALIA (WA)
INIA 19	AA	BB	AA	AA	2.81997	2.15138	I	MEXICO (CIMMYT)
MEXIQUE 9	AA	BB	AA	AA	3.21882	1.01706	I	MEXICO (CIMMYT)
MEXIQUE 58	AA	BB	AA	AA	2.56187	2.24287	I	MEXICO (CIMMYT)
MEXICO 120	AA	BB	AA	AA	2.94711	2.92893	I	MEXICO
MERINDA	AA	BB	AA	AA	2.6715	3.18579	I	AUSTRALIA (NSW)
MELCHIOR	AA	BB	AA	AA	1.72312	1.14804	I	NETHERLANDS
BOLAC	AA	BB	AA	AA	2.66982	2.69544	I	AUSTRALIA (VIC)
BODALLIN	AA	BB	AA	AA	3.34492	2.70399	I	AUSTRALIA (WA)
ROELFS F2007	AA	BB	AA	AA	3.23247	2.3972	I	MEXICO (CIMMYT)
Cul 9	AA	BB	AA	AA	1.17381	1.34884	I	Kazakhstan
LANG	AA	BB	AA	AA	3.05586	3.01168	I	AUSTRALIA (QLD)
RAC875	AA	BB	AA	AA	2.83615	2.91886	I	AUSTRALIA (SA)
Cul 8	AA	BB	AA	AA	NA	1.11659	I	Kazakhstan
MARINGA-RHT1	AA	BB	AA	AA	2.7402	2.50187	I	NA
H 46	AA	BB	AA	AA	3.11554	3.37846	I	AUSTRALIA (WA)
VASCO	AA	BB	AA	AA	2.61405	2.61794	I	AUSTRALIA (QLD)
cid452470sid102	AA	BB	AA	AA	2.79511	2.41041	I	MEXICO (CIMMYT)
FRAME	AA	BB	AA	AA	2.77695	2.7177	I	AUSTRALIA (SA)
cid431798sid387	AA	BB	AA	AA	3.22084	2.95681	I	MEXICO (CIMMYT)
PRECOCE DU JAPON	AA	BB	AA	AA	2.24166	1.33963	I	FRANCE
AROONA	AA	BB	AA	AA	2.67644	2.83661	I	AUSTRALIA (SA)
FRONTANA 3671	AA	BB	AA	AA	1.47514	1.69621	I	BRAZIL
cid257170sid21	AA	BB	AA	AA	3.10858	2.65525	I	MEXICO (CIMMYT)
H 1681A	AA	BB	AA	AA	2.01893	1.69624	I	AFGHANISTAN
CURRAWONG	AA	BB	AA	AA	3.26799	2.83812	I	AUSTRALIA (NSW)
SUNBROOK	AA	BB	AA	AA	NA	NA	I	NA
AUS1490	AA	BB	AA	AA	2.34949	1.87351	I	AUSTRALIA
cid427887sid0	AA	BB	AA	AA	1.94135	2.61971	I	MEXICO (CIMMYT)
LW 350	AA	BB	AA	AA	NA	0.154815	I	GEORGIA
DIAMONDBIRD	AA	BB	AA	AA	2.99094	2.66988	I	AUSTRALIA (NSW)
H 1660	AA	BB	AA	AA	1.55977	1.02503	I	AFGHANISTAN
SERI M82	AA	BB	AA	AA	2.65296	2.71256	I	MEXICO (CIMMYT)
EGA CASTLE ROCK	AA	BB	AA	AA	3.08114	2.86625	I	AUSTRALIA
cid394070sid114	AA	BB	AA	AA	3.23027	2.48447	I	MEXICO (CIMMYT)
AMC 157	AA	BB	AA	AA	1.90465	1.14784	I	IRAN
PUNJAB 24	AA	BB	AA	AA	2.32264	1.27231	I	INDIA
LW 348	AA	BB	AA	AA	1.25667	0.48388	I	TAJIKISTAN
CIANO 79	AA	BB	AA	AA	3.4378	2.47233	I	MEXICO (CIMMYT)
TACUPETO 2001	AA	BB	AA	AA	3.06499	2.42821	I	MEXICO (CIMMYT)
WAWHT 2750	AA	BB	AA	AA	NA	3.09796	I	AUSTRALIA (WA)
H 1411	AA	BB	AA	AA	1.38046	0.875858	I	AFGHANISTAN
AE.SQUARROSA (409)	AA	BB	AA	AA	1.35049	1.18349	I	MEXICO (CIMMYT)
cid460396sid87	AA	BB	AA	AA	3.361	2.81083	I	MEXICO (CIMMYT)
H 1601	AA	BB	AA	AA	1.67864	1.73144	I	AFGHANISTAN
EGA BONNIE ROCK	AA	BB	AA	AA	3.86773	3.23771	I	AUSTRALIA (WA)
WW 80	AA	BB	AA	AA	2.65086	2.55714	I	AUSTRALIA (NSW)
CLEOPATRA	AA	BB	AA	AA	2.94787	2.60807	I	MEXICO (CIMMYT)
Avocet	AA	BB	AA	AA	2.59846	2.31786	I	AUSTRALIA (NSW)
ERADU	AA	BB	AA	AA	3.3598	2.91585	I	AUSTRALIA (WA)
ZEBU	AA	BB	AA	AA	3.21045	2.34258	I	AUSTRALIA (SA)
CALINGIRI	AA	BB	AA	AA	3.48226	2.71014	I	AUSTRALIA (WA)
TINCURRIN	AA	BB	AA	AA	2.47755	3.03107	I	AUSTRALIA (WA)
QAL 2000	AA	BB	AA	AA	2.83482	2.93563	I	AUSTRALIA (NSW)
ZIPPY	AA	BB	AA	AA	3.27979	3.30923	I	AUSTRALIA
cid7506sid110	AA	BB	AA	AA	2.65526	2.64178	I	ARGENTINA
cid388408sid65	AA	BB	AA	AA	2.84829	2.22799	I	MEXICO (CIMMYT)
MARS DE SUEDE ROUGE BARBU	AA	BB	AA	AA	0.451486	0.382384	I	FRANCE
cid8090sid414	AA	BB	AA	AA	2.15269	1.79699	I	MEXICO (CIMMYT)
cid473269sid30	AA	BB	AA	AA	3.45904	2.63341	I	MEXICO (CIMMYT)
DOLLARBIRD	AA	BB	AA	AA	2.96225	1.98081	I	AUSTRALIA (NSW)
cid388384sid40	AA	BB	AA	AA	2.89315	2.87642	I	MEXICO (CIMMYT)
SHORTIM	AA	BB	AA	AA	2.5185	2.39402	I	AUSTRALIA (NSW)
HTWYT-030	AA	BB	AA	AA	3.7596	3.16017	I	MEXICO (CIMMYT)
SUNSTAR	AA	BB	AA	AA	2.79669	3.02206	I	AUSTRALIA (NSW)
LYALLPUR-73	AA	BB	AA	AA	3.14184	2.21304	I	PAKISTAN
H 1357	AA	BB	AA	AA	NA	0.912305	I	AFGHANISTAN
HTWYT-031	AA	BB	AA	AA	3.30941	2.7588	I	MEXICO (CIMMYT)
cid325362sid63	AA	BB	AA	AA	3.35361	2.91302	I	MEXICO (CIMMYT)
H 1311	AA	BB	AA	AA	2.14257	1.50267	I	NA
cid181178sid3	AA	BB	AA	AA	2.49903	1.86601	I	MEXICO (CIMMYT)
BT2277	AA	BB	AA	AA	2.05823	2.51205	I	TUNISIA
WW 1842	AA	BB	AA	AA	3.49223	2.76267	I	AUSTRALIA (NSW)
SIRAZAIAIBARIGI 2	AA	BB	AA	AA	3.03442	0.956903	I	JAPAN
SILVERSTAR	AA	BB	AA	AA	3.32359	3.13619	I	AUSTRALIA (VIC)
BAHATANE 87	AA	BB	AA	AA	2.13931	0.604037	I	ALGERIA
GBA HUNTER	AA	BB	AA	AA	3.4966	2.75001	I	AUSTRALIA (NSW)
GP260	AA	BB	AA	AA	2.04223	0.89947	I	CANADA
GH'S	AA	BB	AA	AA	2.19467	2.20668	I	MEXICO (CIMMYT)
GENARO F 81	AA	BB	AA	AA	3.42122	2.84741	I	MEXICO (CIMMYT)
IRAQ 40	AA	BB	AA	AA	2.07019	1.66673	I	IRAQ
H 1511	AA	BB	AA	AA	1.59531	1.44736	I	AFGHANISTAN
H 1496	AA	BB	AA	AA	2.93863	2.24799	I	AFGHANISTAN
IRAQ 42	AA	BB	AA	AA	1.59874	1.50127	I	IRAQ
INDIA-108	AA	BB	AA	AA	2.445	0.875566	I	INDIA
H 1673	AA	BB	AA	AA	1.94951	0.781634	I	IRAN
INDIA-120	AA	BB	AA	AA	NA	1.36811	I	INDIA
SUNSTATE	AA	BB	AA	AA	2.47183	2.03975	I	AUSTRALIA (NSW)
BATAVIA	AA	BB	AA	AA	3.17011	2.38138	I	AUSTRALIA (QLD)
SUNECA	AA	BB	AA	AA	2.82548	2.72111	I	AUSTRALIA (NSW)
HARRIER	AA	BB	AA	AA	2.50098	2.38793	I	AUSTRALIA (NSW)
KINGS WHITE	AA	BB	AA	AA	2.29652	1.59952	I	AUSTRALIA (SA)
AE.SQUARROSA (1026)	AA	BB	AA	AA	3.10989	2.11108	I	MEXICO (CIMMYT)
AE.SQUARROSA (327)	AA	BB	AA	AA	3.28053	3.08423	I	MEXICO (CIMMYT)
LINCOLN	AA	BB	AA	AA	NA	1.98567	I	UNITED STATES
PROVINS	AA	BB	AA	AA	0.747794	0.555217	I	FRANCE
cid183347sid7	AA	BB	AA	AA	2.011	1.48352	I	MEXICO (CIMMYT)
cid480829sid70	AA	BB	AA	AA	2.06371	2.85584	I	MEXICO (CIMMYT)
PBW 343	AA	BB	AA	AA	3.0912	2.77055	I	INDIA
H 742A	AA	BB	AA	AA	3.16213	3.24741	I	ISRAEL
IRAQ 43	AA	BB	AA	AA	2.1379	1.59508	I	IRAQ
cid460344sid158	AA	BB	AA	AA	3.55732	2.76198	I	MEXICO (CIMMYT)
BAXTER	AA	BB	AA	AA	3.25543	2.45635	I	AUSTRALIA (QLD)
SUNVEX	AA	BB	AA	AA	2.62682	2.6221	I	AUSTRALIA (NSW)
EGA BLANCO	AA	BB	AA	AA	3.58686	3.25435	I	AUSTRALIA
DERRIMUT	AA	BB	AA	AA	1.68259	3.03381	I	AUSTRALIA (VIC)
HTWYT-008	AA	BB	AA	AA	2.87757	2.5785	I	MEXICO (CIMMYT)
ZILVE	AA	BB	AA	AA	NA	0.771812	I	TURKEY
HTWYT-004	AA	BB	AA	AA	3.71458	3.39837	I	MEXICO (CIMMYT)
cid473259sid69	AA	BB	AA	AA	2.9917	3.16798	I	MEXICO (CIMMYT)
ERNIE	AA	BB	AA	AA	1.53681	2.1435	I	UNITED STATES
PALESTINSKAYA	AA	BB	AA	AA	2.01839	1.10543	I	PALESTINE
PERSIA 7	AA	BB	AA	AA	2.04444	1.84131	I	IRAN
WILGOYNE	AA	BB	AA	AA	2.44004	2.41536	I	AUSTRALIA (WA)/CIMMYT
VENTURA	AA	BB	AA	AA	3.21589	2.83466	I	AUSTRALIA (VIC)
PERSIA 21	AA	BB	AA	AA	0.769588	0.747227	I	IRAN
AJANA	AA	BB	AA	AA	3.58157	3.08821	I	AUSTRALIA (WA)
cid428587sid159	AA	BB	AA	AA	2.2748	2.9291	I	MEXICO (CIMMYT)
cid472924sid40	AA	BB	AA	AA	2.95413	2.66545	I	MEXICO (CIMMYT)
H 1627	AA	BB	AA	AA	2.39407	0.992178	I	AFGHANISTAN
cid373279sid61	AA	BB	AA	AA	3.15072	2.87923	I	MEXICO (CIMMYT)
EGYPCIO 208	AA	BB	AA	AA	NA	0.865563	I	ARGENTINA
SUNVALE	AA	BB	AA	AA	1.41751	2.47179	I	AUSTRALIA (NSW)
CHARA	AA	BB	AA	AA	3.0095	2.59382	I	AUSTRALIA (VIC)
COOK	AA	BB	AA	AA	1.96456	2.66564	I	AUSTRALIA (QLD)
GLUYAS EARLY	AA	BB	AA	AA	2.45344	2.08957	I	AUSTRALIA
cid279818sid83	AA	BB	AA	AA	3.34478	2.1838	I	MEXICO (CIMMYT)
CRANBROOK	AA	BB	AA	AA	3.0751	2.33966	I	AUSTRALIA (WA)
MILLEWA	AA	BB	AA	AA	NA	NA	I	NA
YOUNG	AA	BB	AA	AA	3.31697	2.42929	I	AUSTRALIA (VIC)
WYALKATCHEM BPA	AA	BB	AA	AA	3.34661	3.26262	I	AUSTRALIA (WA)
LONGREACH SCOUT	AA	BB	AA	AA	2.48709	3.52749	I	AUSTRALIA (WA)
GUARDIAN	AA	BB	AA	AA	3.54163	2.94012	I	GREAT BRITAIN
WAAGAN	AA	BB	AA	AA	2.85196	2.37463	I	AUSTRALIA (VIC)
ROSELLA	AA	BB	AA	AA	2.79118	2.89887	I	AUSTRALIA (NSW)
VULCAN	AA	BB	AA	AA	2.75061	3.12007	I	AUSTRALIA (NSW)
cid473243sid61	AA	BB	AA	AA	3.17397	2.00776	I	MEXICO (CIMMYT)
cid20570sid926	AA	BB	AA	AA	3.36196	2.81167	I	MEXICO (CIMMYT)
cid473245sid56	AA	BB	AA	AA	3.44632	2.24672	I	MEXICO (CIMMYT)
HTWYT-029	AA	BB	AA	AA	3.33999	3.09571	I	MEXICO (CIMMYT)
COMBINATION III	AA	BB	AA	AA	2.0453	1.07916	I	AUSTRALIA (NSW)
cid473248sid51	AA	BB	AA	AA	2.36392	0.43986	I	MEXICO (CIMMYT)
CLEARFIELD JNZ	AA	BB	AA	AA	3.47446	2.94886	I	AUSTRALIA (VIC)
INDIA-231	AA	BB	AA	AA	1.51606	0.278847	I	INDIA
HTWYT-011	AA	BB	AA	AA	3.41612	2.62495	I	MEXICO (CIMMYT)
cid306547sid131	AA	BB	AA	AA	3.31781	2.20692	I	MEXICO (CIMMYT)
QT 7475	AA	BB	AA	AA	3.74884	2.86442	I	AUSTRALIA
cid260142sid43	AA	BB	AA	AA	3.71492	2.63699	I	MEXICO (CIMMYT)
cid6831sid90	AA	BB	AA	AA	3.29338	2.0088	I	MEXICO (CIMMYT)
COPPADRA	AA	BB	AA	AA	1.06424	0.932916	I	TURKEY
H 1326	AA	BB	AA	AA	1.59128	0.954004	I	NA
WARATAH	AA	BB	AA	AA	2.42436	1.66195	I	AUSTRALIA (NSW)
cid388327sid117	AA	BB	AA	AA	1.88216	1.26743	I	MEXICO (CIMMYT)
AE.SQUARROSA (TAUS)	AA	BB	AA	AA	2.76999	2.34646	I	MEXICO (CIMMYT)
cid472923sid71	AA	BB	AA	AA	3.32231	2.19761	I	MEXICO (CIMMYT)
LW 349	AA	BB	AA	AA	0.891751	0.645667	I	TAJIKISTAN
MATONG	AA	BB	AA	AA	2.88387	2.06166	I	AUSTRALIA (VIC)
KUKRI	AA	BB	AA	AA	2.60294	2.4455	I	AUSTRALIA (SA)
cid472918sid54	AA	BB	AA	AA	2.83579	3.21993	I	MEXICO (CIMMYT)
SONORA 64	AA	BB	AA	AA	2.06573	0.722072	I	MEXICO (CIMMYT)
BERKUT	AA	BB	AA	AA	3.26651	2.60826	I	MEXICO (CIMMYT)
BABAX	AA	BB	AA	AA	3.52925	2.66016	I	MEXICO (CIMMYT)
WARIGAL	AA	BB	AA	AA	3.15496	2.68245	I	AUSTRALIA (SA)
H 1617	AA	BB	AA	AA	1.53241	0.499667	I	AFGHANISTAN
H 1584	AA	BB	AA	AA	1.32278	0.520088	I	AFGHANISTAN
H 1546	AA	BB	AA	AA	2.0042	1.54211	I	AFGHANISTAN
INDIA-325	AA	BB	AA	AA	1.59617	1.2426	I	INDIA
DRYSDALE	AA	BB	AA	AA	2.81108	2.69144	I	AUSTRALIA (VIC)
H 1509	AA	BB	AA	AA	2.75731	1.53649	I	AFGHANISTAN
INDIA-107	AA	BB	AA	AA	NA	0.435223	I	INDIA
H 1525	AA	BB	AA	AA	0.542031	1.65049	I	AFGHANISTAN
IRAQ 47	AA	BB	AA	AA	2.44018	1.43175	I	IRAQ
H 1691	AA	BB	AA	AA	1.97972	0.848291	I	AFGHANISTAN
H 1398	AA	BB	AA	AA	2.10565	1.27011	I	AFGHANISTAN
cid388412sid46	AA	BB	AA	AA	3.25668	2.05865	I	MEXICO (CIMMYT)
SOKOLL	AA	BB	AA	AA	2.58016	3.11129	I	MEXICO (CIMMYT)
H 1527	AA	BB	AA	AA	1.521	1.77718	I	AFGHANISTAN
W 100	AA	BB	AA	AA	2.48188	2.17548	I	PAKISTAN
W 96	AA	BB	AA	AA	2.2481	3.39841	I	PAKISTAN
H 344	AA	BB	AA	AA	NA	0.812702	I	AFGHANISTAN
INDIA-105	AA	BB	AA	AA	2.91179	1.3438	I	INDIA
H 1686B	AA	BB	AA	AA	NA	0.0580253	I	AFGHANISTAN
cid195095sid3	AA	BB	AA	AA	2.3674	1.62772	I	MEXICO (CIMMYT)
MAGENTA	AA	BB	AA	AA	3.25864	3.148	I	AUSTRALIA (WA)
H 1309	AA	BB	AA	AA	NA	1.06972	I	AFGHANISTAN
H 1582	AA	BB	AA	AA	1.92394	1.08524	I	AFGHANISTAN
GATCHER	AA	BB	AA	AA	1.96545	1.98517	I	AUSTRALIA (NSW)
H 1329	AA	BB	AA	AA	1.12414	0.666524	I	NA
SIETE CERROS	AA	BB	AA	AA	2.79456	2.39353	I	MEXICO (CIMMYT)
W 93	AA	BB	AA	AA	1.11829	0.996316	I	PAKISTAN
cid473247sid51	AA	BB	AA	AA	2.53105	2.42982	I	MEXICO (CIMMYT)
AE. SQUARROSA (447)	AA	BB	AA	AA	2.85374	2.87333	I	MEXICO (CIMMYT)
cid420707sid98	AA	BB	AA	AA	3.30116	3.27082	I	MEXICO (CIMMYT)
cid8626sid502	AA	BB	AA	AA	3.12322	2.19613	I	MEXICO (CIMMYT)
SUNCO	AA	BB	AA	AA	3.68259	2.59368	I	AUSTRALIA (NSW)
MOLINEUX	AA	BB	AA	AA	2.80446	2.62031	I	AUSTRALIA (SA)
TAM 107	AA	BB	AA	AA	2.35463	2.54864	I	UNITED STATES (Texas)
H 45	AA	BB	AA	AA	3.18824	2.18374	I	AUSTRALIA (NSW)
CASCADES	AA	BB	AA	AA	2.95817	3.25868	I	AUSTRALIA (WA)
G72300	AA	BB	AA	AA	2.13536	1.55231	I	GREECE
cid427658sid33	AA	BB	AA	AA	3.0402	2.74726	I	MEXICO (CIMMYT)
GASCOIGNE	AA	BB	AA	AA	3.24292	3.05497	I	AUSTRALIA/SOUTH AFRICA
BASS	AA	BB	AA	AA	3.25242	2.61363	I	AUSTRALIA (QLD)
TAMMARIN ROCK	AA	BB	AA	AA	3.90151	3.07725	I	AUSTRALIA (WA)
cid394087sid30	AA	BB	AA	AA	2.60981	2.37984	I	MEXICO (CIMMYT)
cid473251sid35	AA	BB	AA	AA	2.31675	1.5256	I	MEXICO (CIMMYT)
CD 87	AA	BB	AA	AA	2.29373	2.59039	I	AUSTRALIA
KE HAN NO 8	AA	BB	AA	AA	2.15166	1.62148	I	CHINA
CARNAMAH	AA	BB	AA	AA	3.01631	2.89941	I	AUSTRALIA (WA)
TAFERSTAT	AA	BB	AA	AA	1.80493	2.32096	I	ALGERIA
PERSIA 11	AA	BB	AA	AA	1.91798	1.67596	I	IRAN
cid82996sid44	AA	BB	AA	AA	3.64725	3.14619	I	MEXICO (CIMMYT)
AMC 142	AA	BB	AA	AA	2.04512	1.20527	I	IRAN
cid463508sid200	AA	BB	AA	AA	2.74021	1.36139	I	MEXICO (CIMMYT)
KENNEDY	AA	BB	AA	AA	3.40111	2.95739	I	AUSTRALIA (QLD)
LW 342	AA	BB	AA	AA	1.86056	1.15442	I	CHINA
MEERING	AA	BB	AA	AA	2.56262	2.43507	I	AUSTRALIA (VIC)
PEAKE	AA	BB	AA	AA	3.17118	2.80108	I	AUSTRALIA (VIC)
WESTONIA	AA	BB	AA	AA	3.65792	3.05725	I	AUSTRALIA (WA)
REEVES	AA	BB	AA	AA	3.22922	2.45778	I	AUSTRALIA (WA)
cid7401sid122	AA	BB	AA	AA	2.7392	3.24835	I	MEXICO (CIMMYT)
H 1703	BB	AA	BB	BB	1.42816	1.86068	II	AFGHANISTAN
HTWYT-010	BB	AA	BB	BB	2.50225	2.07591	II	MEXICO (CIMMYT)
INDIA-227	BB	AA	BB	BB	1.24056	1.6948	II	PAKISTAN
NORIN10 BREVOR	BB	AA	BB	BB	2.74059	1.91818	II	USA
VOROBEY	BB	AA	BB	BB	3.3881	2.78183	II	MEXICO (CIMMYT)
PURPLE STRAW 885	BB	AA	BB	BB	2.30936	0.773155	II	UNITED STATES
QUADRAT	BB	AA	BB	BB	2.57889	1.45349	II	AUSTRALIA (VIC)
GAMENYA	BB	AA	BB	BB	2.87122	2.35894	II	AUSTRALIA (NSW)
H 1655	BB	AA	BB	BB	1.87546	0.910452	II	AFGHANISTAN
AE.SQUARROSA (1027)	BB	AA	BB	BB	1.46133	0.913352	II	MEXICO (CIMMYT)
GALA	BB	AA	BB	BB	2.52643	1.92278	II	AUSTRALIA (QLD)
VIGOUR 18	BB	AA	BB	BB	0.662932	0.513448	II	AUSTRALIA
H 1644	BB	AA	BB	BB	2.03625	0.869293	II	AFGHANISTAN
OLSEN SIB	BB	AA	BB	BB	NA	2.27469	II	MEXICO
G66257	BB	AA	BB	BB	1.78748	1.49542	II	GREECE
TRAMI PUY DE DOME	BB	AA	BB	BB	NA	0.716095	II	FRANCE
FESTIGUAY	BB	AA	BB	BB	2.7637	2.22641	II	AUSTRALIA (NSW)
DUNDEE	BB	AA	BB	BB	1.84724	1.52789	II	NA
FREE GALLIPOLI	BB	AA	BB	BB	2.30174	0.985127	II	AUSTRALIA (VIC)
AC BARRIE	BB	AA	BB	BB	2.6588	1.14934	II	CANADA
AE.SQUARROSA (1018)	BB	AA	BB	BB	NA	NA	II	MEXICO (CIMMYT)
HERON	BB	AA	BB	BB	2.85653	2.03361	II	AUSTRALIA (NSW)
AVOCET	BB	AA	BB	BB	2.62914	2.25641	II	AUSTRALIA (NSW)
KEWELL	BB	AA	BB	BB	2.43657	1.9426	II	AUSTRALIA (VIC)
SUNELG	BB	AA	BB	BB	NA	NA	II	NA
H 1534	BB	AA	BB	BB	1.0602	0.504591	II	AFGHANISTAN
H 1440	BB	AA	BB	BB	1.87855	1.39471	II	AFGHANISTAN
FORD	BB	AA	BB	BB	1.62363	1.15517	II	AUSTRALIA (SA)
FLORENCE	BB	AA	BB	BB	2.10039	0.702154	II	AUSTRALIA (NSW)
LW 336	BB	AA	BB	BB	NA	0.936971	II	MOROCCO
AE.SQUARROSA (358)	BB	AA	BB	BB	1.61078	0.304538	II	MEXICO (CIMMYT)
KITE	BB	AA	BB	BB	3.08087	2.56185	II	AUSTRALIA (NSW)
MENDOS	BB	AA	BB	BB	1.45538	1.85784	II	AUSTRALIA (NSW)
ROBLIN	BB	AA	BB	BB	1.90559	1.75545	II	CANADA
ODESSA EXP STA 17413	BB	AA	BB	BB	NA	0.699915	II	SYRIA
cid435303sid61	BB	AA	BB	BB	1.99122	1.43168	II	MEXICO (CIMMYT)
BUCKLEY	BB	AA	BB	BB	3.15958	2.73738	II	AUSTRALIA (SA)
H 1685	BB	AA	BB	BB	1.58311	0.742099	II	AFGHANISTAN
VOROBEY	BB	AA	BB	BB	3.68948	2.24913	II	MEXICO (CIMMYT)
WARDS PROLIFIC	BB	AA	BB	BB	1.87681	1.95241	II	AUSTRALIA (VIC)
AC DOMAIN	BB	AA	BB	BB	3.06946	1.0253	II	CANADA
H 1288	BB	AA	BB	BB	1.78077	1.19117	II	NA
DIRK	BB	AA	BB	BB	1.6241	2.06353	II	AUSTRALIA (SA)
GAMENYA	BB	AA	BB	BB	2.8991	2.10815	II	AUSTRALIA (NSW)
AE.SQUARROSA (895)	BB	AA	BB	BB	2.46321	1.55124	II	MEXICO (CIMMYT)
HUDSONS EARLY PURPLE STRAW	BB	AA	BB	BB	2.04157	0.744274	II	AUSTRALIA (NSW)
ROWAN	BB	AA	BB	BB	2.57628	1.45793	II	AUSTRALIA (QLD)
AE.SQUARROSA (309)	BB	AA	BB	BB	2.85734	3.06836	II	MEXICO (CIMMYT)
AE.SQUARROSA (878)	BB	AA	BB	BB	2.1289	1.43377	II	MEXICO (CIMMYT)
cid335446sid92	BB	AA	BB	BB	3.22761	2.33501	II	MEXICO (CIMMYT)
AE.SQUARROSA (220)	BB	AA	BB	BB	NA	0.691387	II	MEXICO (CIMMYT)
AE.SQUARROSA (460)	BB	AA	BB	BB	NA	1.39822	II	MEXICO (CIMMYT)
117/VAR.12-564	BB	AA	BB	BB	1.85481	1.07627	II	PAKISTAN
M45/66	BB	AA	BB	BB	2.30042	1.3991	II	ARGENTINA
INDIA-223	BB	AA	BB	BB	NA	0.72999	II	INDIA
PINNACLE	BB	AA	BB	BB	2.84363	2.46731	II	AUSTRALIA (VIC)
RAVEN	BB	AA	BB	BB	2.38866	2.36832	II	AUSTRALIA (NSW)
KODA	BB	AA	BB	BB	2.4483	1.64534	II	AUSTRALIA (NSW)
INDIAN-6	BB	AA	BB	BB	1.8916	1.89949	II	INDIA
RANEE	BB	AA	BB	BB	2.60414	1.23061	II	AUSTRALIA (VIC)
HALBERD	BB	AA	BB	BB	2.87191	2.24332	II	AUSTRALIA (SA)
TENNANT	BB	AA	BB	BB	1.88434	1.73239	II	AUSTRALIA
H 1703	BB	AA	BB	BB	1.88243	1.77122	II	AFGHANISTAN
ULLA	BB	AA	BB	BB	NA	0.537043	II	FINLAND
CHUAN MAI 18	BB	AA	BB	BB	2.8239	1.73124	II	CHINA
cid279807sid86	BB	AA	BB	BB	2.61074	2.53558	II	MEXICO (CIMMYT)
AE.SQUARROSA (458)	BB	AA	BB	BB	NA	0.489664	II	MEXICO (CIMMYT)
CPI 133842	BB	AA	BB	BB	NA	NA	II	MEXICO (CIMMYT)
H 1594	BB	AA	BB	BB	1.79571	1.47163	II	AFGHANISTAN
INDIA-322	BB	AA	BB	BB	2.12783	0.925268	II	INDIA
cid385184sid26	BB	AA	BB	BB	3.27365	2.52854	II	MEXICO (CIMMYT)
HTWYT-014	BB	AA	BB	BB	2.2368	2.71857	II	MEXICO (CIMMYT)
CURRAWA	BB	AA	BB	BB	2.53391	0.789538	II	AUSTRALIA (VIC)
AE.SQUARROSA (221)	BB	AA	BB	BB	3.54281	1.90909	II	MEXICO (CIMMYT)
AUS29529	BB	AA	BB	BB	2.32088	2.15711	II	MEXICO (CIMMYT)
INDIA-106	BB	AA	BB	BB	NA	0.227155	II	INDIA
AE.SQUARROSA (518)	BB	AA	BB	BB	NA	0.812081	II	MEXICO (CIMMYT)
W 195	BB	AA	BB	BB	1.80389	0.897366	II	INDIA
DU TOITS	BB	AA	BB	BB	2.34063	1.0327	II	AUSTRALIA (SA)
AE.SQUARROSA (198)	BB	AA	BB	BB	NA	NA	II	NA
FALCON	BB	AA	BB	BB	NA	1.63067	II	AUSTRALIA (NSW)
6-1-3	BB	AA	BB	BB	NA	1.41552	II	EGYPT
BARHAM	BB	AA	BB	BB	2.54495	2.69569	II	AUSTRALIA (VIC)
Gabo	BB	AA	BB	BB	2.92506	2.50562	II	AUSTRALIA (NSW)
MADDEN	BB	AA	BB	BB	2.7489	2.32034	II	AUSTRALIA (WA)
FEDERATION	BB	AA	BB	BB	2.85214	1.26809	II	AUSTRALIA (NSW)
GHURKA	BB	AA	BB	BB	2.75409	1.4699	II	AUSTRALIA (VIC)
LW 368	AA	BB	AA	BB	0.918015	0.668346	III	PALESTINE
IRAN 68	AA	BB	BB	BB	NA	0.368896	IV	IRAN
H 1445	BB	BB	BB	BB	0.869883	0.354454	V	AFGHANISTAN
H 1531	BB	BB	BB	BB	0.504633	0.787971	V	AFGHANISTAN
H 1494	BB	BB	BB	BB	1.43503	1.28235	V	AFGHANISTAN
H 1540	BB	BB	BB	BB	2.0422	1.13327	V	AFGHANISTAN
H 1523	BB	BB	BB	BB	2.16353	1.63451	V	AFGHANISTAN
MEIRA	BB	AA	AA	AA	NA	0.496721	VI	SPAIN
cid94795sid11	AA	AA	BB	BB	2.5265	2.7806	VII	MEXICO (CIMMYT)
SYNTHETIC W7984	AA	AA	BB	BB	-0.0426201	0.776492	VII	MEXICO (CIMMYT)
PI626580-4	AA	AA	BB	BB	3.11041	3.0931	VII	NA
SPEAR	AA	AA	BB	BB	2.90782	3.1105	VII	AUSTRALIA (SA)
FANG	AA	AA	BB	BB	3.71332	2.71395	VII	AUSTRALIA (SA)
SYNTHETIC W7984	AA	AA	BB	BB	0.444517	1.27406	VII	MEXICO (CIMMYT)
LW 353	AA	AA	BB	BB	1.08424	0.504061	VII	RUSSIA
AE.SQUARROSA (214)	AA	AA	BB	BB	1.93525	3.00449	VII	MEXICO (CIMMYT)
ENDURE	AA	AA	BB	BB	2.35	2.12077	VII	AUSTRALIA (VIC)
GLENWARI	AA	AA	BB	BB	NA	1.54171	VII	AUSTRALIA (NSW)
AE.SQUARROSA (1029)	AA	AA	BB	BB	NA	NA	VII	NA
POTAM 70	AA	AA	BB	BB	2.4867	3.16406	VII	MEXICO (CIMMYT)
YITPI	AA	AA	BB	BB	1.7842	3.0083	VII	AUSTRALIA
DAGGER	AA	AA	BB	BB	2.54786	2.84259	VII	AUSTRALIA (SA)
AE.SQUARROSA (502)	AA	AA	BB	BB	NA	0.771435	VII	MEXICO (CIMMYT)
AE.SQUARROSA (314)	AA	AA	BB	BB	NA	0.192514	VII	MEXICO (CIMMYT)
CORRELL	AA	AA	BB	BB	3.13109	2.8564	VII	AUSTRALIA (SA)
AE.SQUARROSA (188)	AA	AA	BB	BB	NA	NA	VII	MEXICO (CIMMYT)
AE.SQUARROSA (629)	AA	AA	BB	BB	2.75835	2.07306	VII	MEXICO (CIMMYT)
AE.SQUARROSA (658)	AA	AA	BB	BB	1.33182	1.28538	VII	MEXICO (CIMMYT)
TRIDENT	AA	AA	BB	BB	3.20665	2.72918	VII	AUSTRALIA (SA)
CPI 133859	AA	AA	BB	BB	NA	NA	VII	NA
AE.SQUARROSA (222)	AA	AA	BB	BB	3.14659	1.55485	VII	MEXICO (CIMMYT)
